# Supplementary material for: Divergent photosynthesis and leaf respiration responses of four common subtropical tree species to modest warming
Source: Research Square preprint supplement (doi:10.21203/rs.3.rs-6915962/v1), 2025-07-01

**Supplementary data**

**Table. S1 Summary of all traits measured in this study for species growth in the warm and control site.** Data are means± SE. t value with significant stars.

| **Classification** | **Traits** | **C. Hystrix Mean± SE** | | | ***O. Pinnata* Mean± SE** | | | ***P. Massoniana* Mean± SE** | | | ***S. Superba* Mean± SE** | | |
| --- | --- | --- | --- | --- | --- | --- | --- | --- | --- | --- | --- | --- | --- |
| **Control** | **Warming** | ***t* value** | **Control** | **Warming** | ***t* value** | **Control** | **Warming** | ***t* value** | **Control** | **Warming** | ***t* value** |
| **Growth** | **PH** | 2.3 ± 0.02 | 2.2 ± 0.1 | **0.61** | 2.09 ± 0.07 | 2.65 ± 0.09 | **-4.66**** | 1.6 ± 0.02 | 1.9 ± 0.0 | **-4.35**** | 1.76 ± 0.08 | 2.03 ± 0.04 | **-2.94*** |  |
| **DBH** | 3.94 ± 0.4 | 3.92 ± 0.1 | 0.04 | 4.6 ± 0.3 | 6.2 ± 0.5 | **-2.59*** | 4.3 ± 0.37 | 4.3 ± 0.33 | 0.29 | 3.58 ± 0.2 | 4.5 ± 0.3 | -1.96 |
| **TB** | 307 ± 26 | 298 ± 17.5 | **0.27** | 338 ± 20.6 | 457 ± 23.3 | **-3.57*** | 328 ± 27.7 | 374 ± 27.4 | -1.2 | 264 ± 17.6 | 330 ± 10.2 | **-3.2*** |
| **Physiology** | **A** | 2.5 ± 0.06 | 2.1 ± 0.02 | **5.13**** | 7.06 ± 0.03 | 8.76 ± 0.1 | **-10.2***** | 3.9 ± 0.03 | 4.6 ± 0.1 | **-6.77**** | 5.31 ± 0.08 | 6.96 ± 0.07 | **-15.8***** |
| **gs** | 0.11 ± 0.005 | 0.09 ± 0.001 | **3.73*** | 0.41± 0.009 | 0.47 ± 0.009 | **-4.72**** | 0.14 ± 0.009 | 0.19 ± 0.007 | **-3.77**** | 0.22 ± 0.01 | 0.28 ± 0.009 | **-4.08**** |
| **Rn** | 0.08 ± 0.01 | 0.1 ± 0.002 | -1.84 | 0.38 ± 0.01 | 0.51 ± 0.01 | **-6.06***** | 0.16 ± 0.008 | 0.21 ± 0.007 | **-4.1**** | 0.30 ± 0.01 | 0.41 ± 0.009 | **-5.22**** |
| **Fv/Fm** | 0.75 ± 0.08 | 0.72 ± 0.01 | 2.15 | 0.83 ± 0.01 | 0.82 ± 0.005 | 2.1 | 0.85 ± 0.008 | 0.83 ± 0.007 | **2.1** | 0.86 ± 0.002 | 0.84 ± 0.003 | **2.96*** |
| **Anatomy** | **CHL A** | 0.66 ± 0.05 | 0.79 ± 0.03 | -2.08 | 1.07 ± 0.01 | 1.08 ± 0.005 | -1.11 | 0.76 ± 0.01 | 0.92 ± 0.005 | **-6.81**** | 0.97 ± 0.03 | 1.05 ± 0.02 | -2.56 |
| **CHL B** | 0.35 ± 0.02 | 0.57 ± 0.03 | **-5.07**** | 0.59 ± 0.03 | 0.71 ± 0.003 | **-3.52*** | 0.34 ± 0.003 | 0.4 ± 0.002 | **-15.6***** | 0.46 ± 0.01 | 0.76 ± 0.02 | **-10.6***** |
| **T CHL** | 1.02 ± 0.06 | 1.37 ± 0.07 | **-3.5**** | 1.6 ± 0.04 | 1.8 ± 0.007 | **-3.15*** | 1.1 ± 0.008 | 1.3 ± 0.005 | **-18.18***** | 1.44 ± 0.04 | 1.82 ± 0.02 | **-7.7***** |
| **Carotene** | 0.6 ± 0.04 | 1 ± 0.02 | **-7.25***** | 1.02 ± 0.01 | 1.07 ±0.004 | **-2.65*** | 0.52 ± 0.01 | 0.95 ± 0.01 | **-9.09***** | 0.94 ± 0.04 | 0.97 ± 0.02 | **-0.67** |
| **SD** | 16.2 ± 0.3 | 11.8 ± 0.2 | **10.37***** | 23.2 ± 0.5 | 28.2 ± 0.3 | **-7.21***** | 15 ± 0 | 15.6 ± 0.24 | -2.49 | 28.4 ± 0.8 | 33.8 ± 0.5 | **-5.14**** |
| **SL** | 17.6 ± 0.3 | 12.7± 0.2 | **9.45***** | 21.5 ± 0.4 | 25.2 ± 0.2 | **-7.39***** | 16.3 ± 0.5 | 21.4 ± 0.21 | **-8.09***** | 30.2 ± 0.2 | 33.4 ± 0.4 | **-5.98**** |
| **LA** | 11.6 ± 0.7 | 15.6 ± 0.5 | **-4.26**** | 40.4 ± 2.6 | 53 ± 0.3 | **-4.76**** | 1.51 ± 0.1 | 1.8 ± 0.02 | -2.74 | 44.8 ± 2.8 | 52.7 ± 1.07 | **-3.8*** |
| **SLA** | 14.7 ± 0.7 | 15.3 ± 0.2 | -0.81 | 12.7 ± 0.2 | 14.8 ± 0.3 | **-4.4**** | 1.9 ± 0.09 | 2.8 ± 0.3 | -2.42 | 11.9 ± 0.18 | 12.7 ± 0.16 | **-3.09*** |
| **Water** | Ψ**pd** | -0.94 ± 0.009 | -1.04 ± 0.01 | **-7.01***** | -0.49 ± 0.01 | -0.62 ± 0.01 | **-8.09***** | -0.74 ± 0.009 | -0.84 ± 0.01 | **-6.38***** | -0.35 ± 0.01 | -0.44 ± 0.007 | **-6.6***** |
| Ψ**md** | -1.71 ± 0.01 | -1.89 ± 0.01 | **-10.7***** | -0.83 ± 0.01 | -0.96 ± 0.01 | **-7.15***** | -1.14± 0.01 | -1.38 ± 0.01 | **-10.7***** | -0.74 ± 0.008 | -0.85 ± 0.01 | **-7.90***** |

**Fig. S1** Total biomass of *Castanopsis hystrix*, *Ormosia Pinnata, Pinus massoniana and Schima superba* grown in the warming site and control site. Error bars are standard error (n= 5). Asterisks (*), (**) and (***) indicate that there are significant differences at *p*< 0.05, *p*< 0.01 and *p*< 0.001 between the warming and the control plots, respectively. Mean values of plasticity of the four species are reported for each trait.


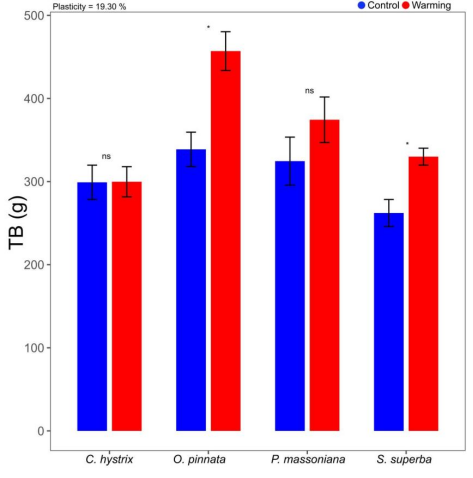


**Fig. S2** Leaf area (a), specific leaf area (b), stomatal length (c) and stomatal density (d) for *Castanopsis hystrix*, *Ormosia Pinnata, Pinus massoniana and Schima superba* grown in the warming site and control site. Error bars are standard error (n= 5). Asterisks (*), (**) and (***) indicate that there are significant differences at *p* < 0.05, *p* < 0.01 and *p* < 0.001 between the warming and the control plots, respectively. Mean values of plasticity of the four species are reported for each trait.

**
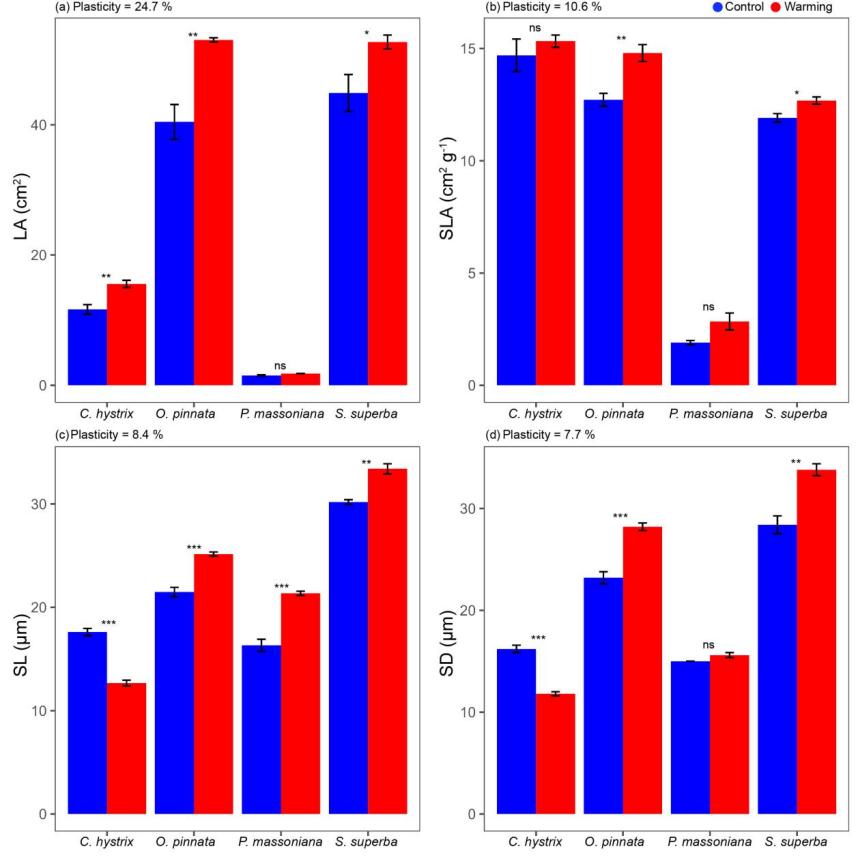
**

**Fig. S3** CHL A (a), CHL B (b), T Chl (c) and Carotenoids (d) for *Castanopsis hystrix*, *Ormosia Pinnata, Pinus massoniana and Schima superba* grown in the warming site and control site. Error bars are standard error (n= 5 trees). Asterisks (*), (**) and (***) indicate that there are significant differences at *p*< 0.05, *p*< 0.01 and *p*< 0.001 between the warming and the control plots, respectively. Mean values of plasticity of the four species are reported for each trait.


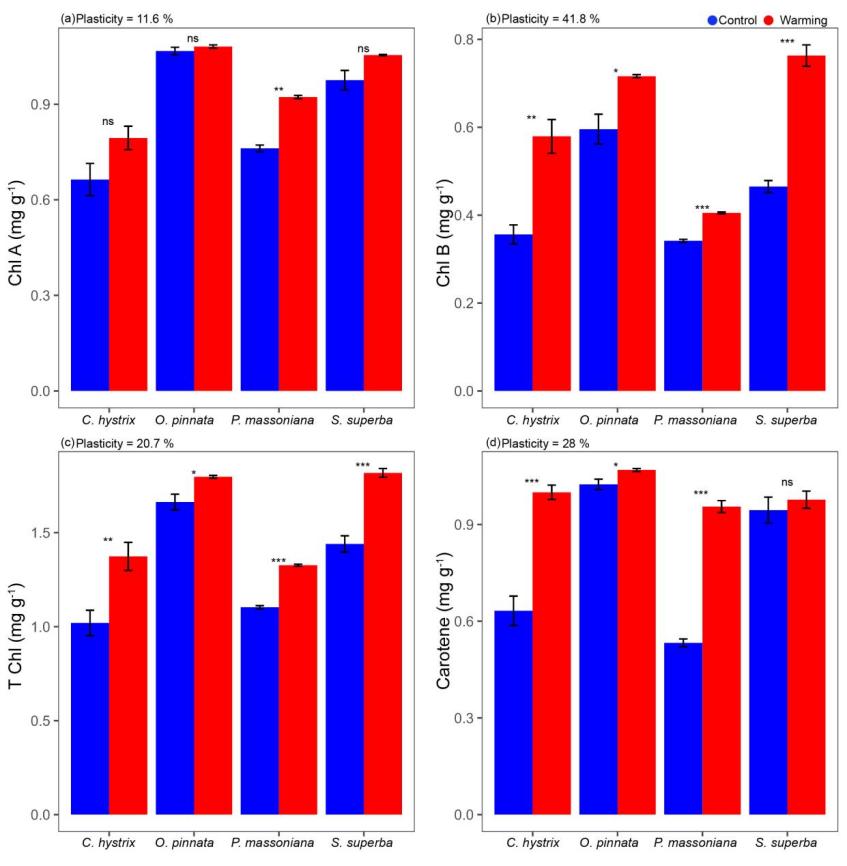


**Fig. S4** Ψpd (a) and Ψmd (b) for *Castanopsis hystrix*, *Ormosia Pinnata, Pinus massoniana and Schima superba* grown in the warming site and control site. Error bars are standard error (n= 5). Asterisks (*), (**) and (***) indicate that there are significant differences at *p*< 0.05, *p*< 0.01 and *p*< 0.001 between the warming and the control plots, respectively. Mean values of plasticity of the four species are reported for each trait.


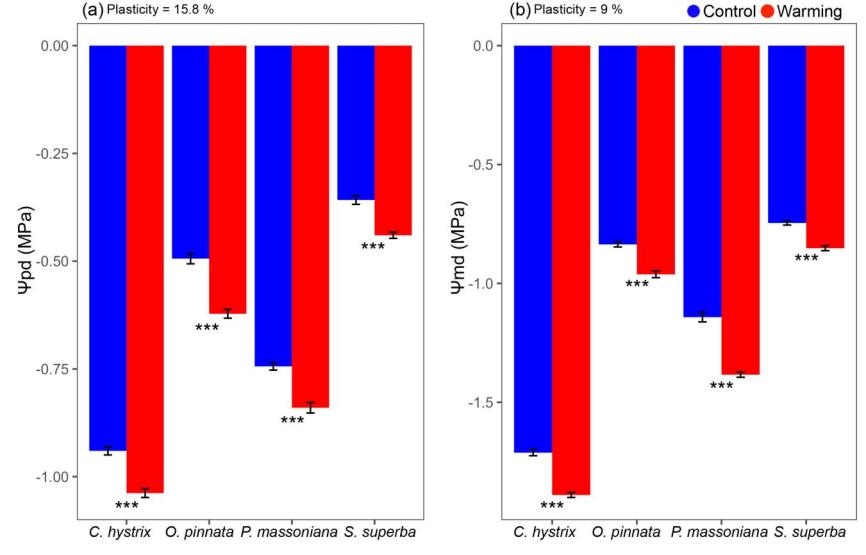


**Fig. S5** The relationships of photosynthetic rate A with SL (a) and SD (c) and night respiration (Rn) with SL (b) and SD (d). Species under control are shown in blue; Warming condition species in red. Only statistically significant relationships (*p*< 0.05) are shown as solid lines with shaded areas representing the 95% confidence interval.


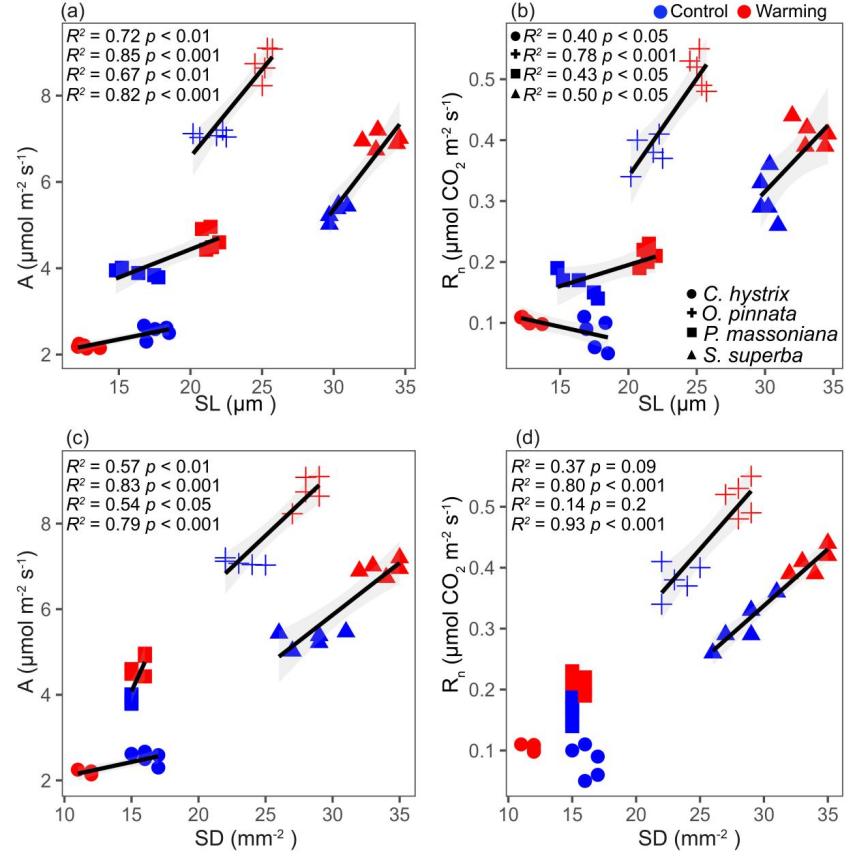

Supplement: Supplementary file 1 [file f57dd14de3b20f6fc808a34e.docx]
